# Supplementary material for: DHEA in Elderly Women and DHEA or Testosterone in Elderly Men
Source: Atypon-hosted journal article supplement (doi:10.1056/nejmoa054629), 2006-10-18
Supplement: nejm_nair_sa1.pdf [file nejm_nair_sa1.pdf]

## Supplementary Appendix

This appendix has been provided by the authors to give readers additional information about their work.

Supplement to: Nair KS, Rizza RA, O'Brien P, et al. DHEA in elderly women and DHEA or testosterone in elderly men. *N Engl J Med* 2006;355:1647-59.

Supplement Figure 1: Glucose and insulin responses following standard meal ingestion. Values shown represent means at 24 months after adjustment for baseline value, with 95% CI. There were no significant changes between treatment groups at either 12 months (not shown) or at 24 months (based on area under curve)

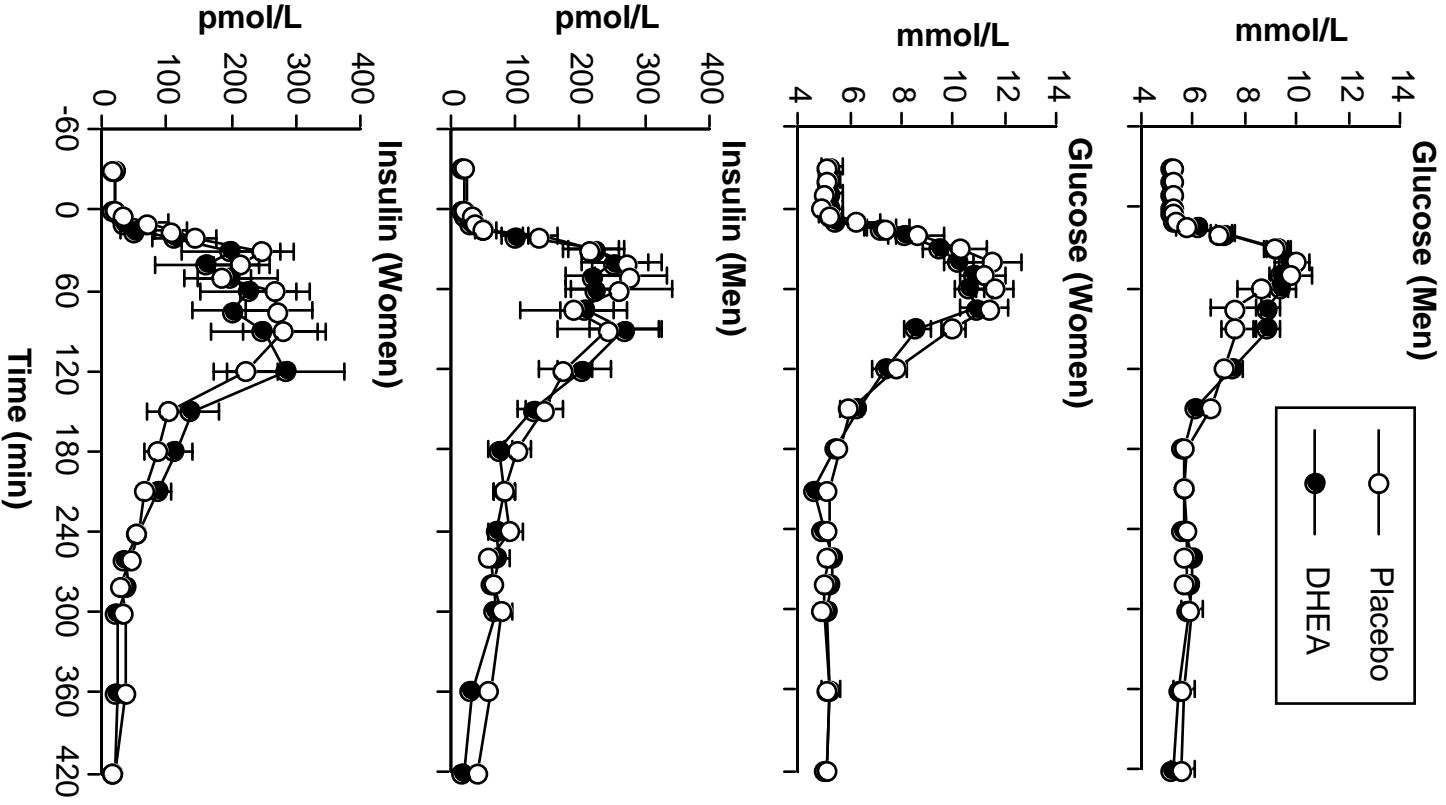

### Median (IQR)

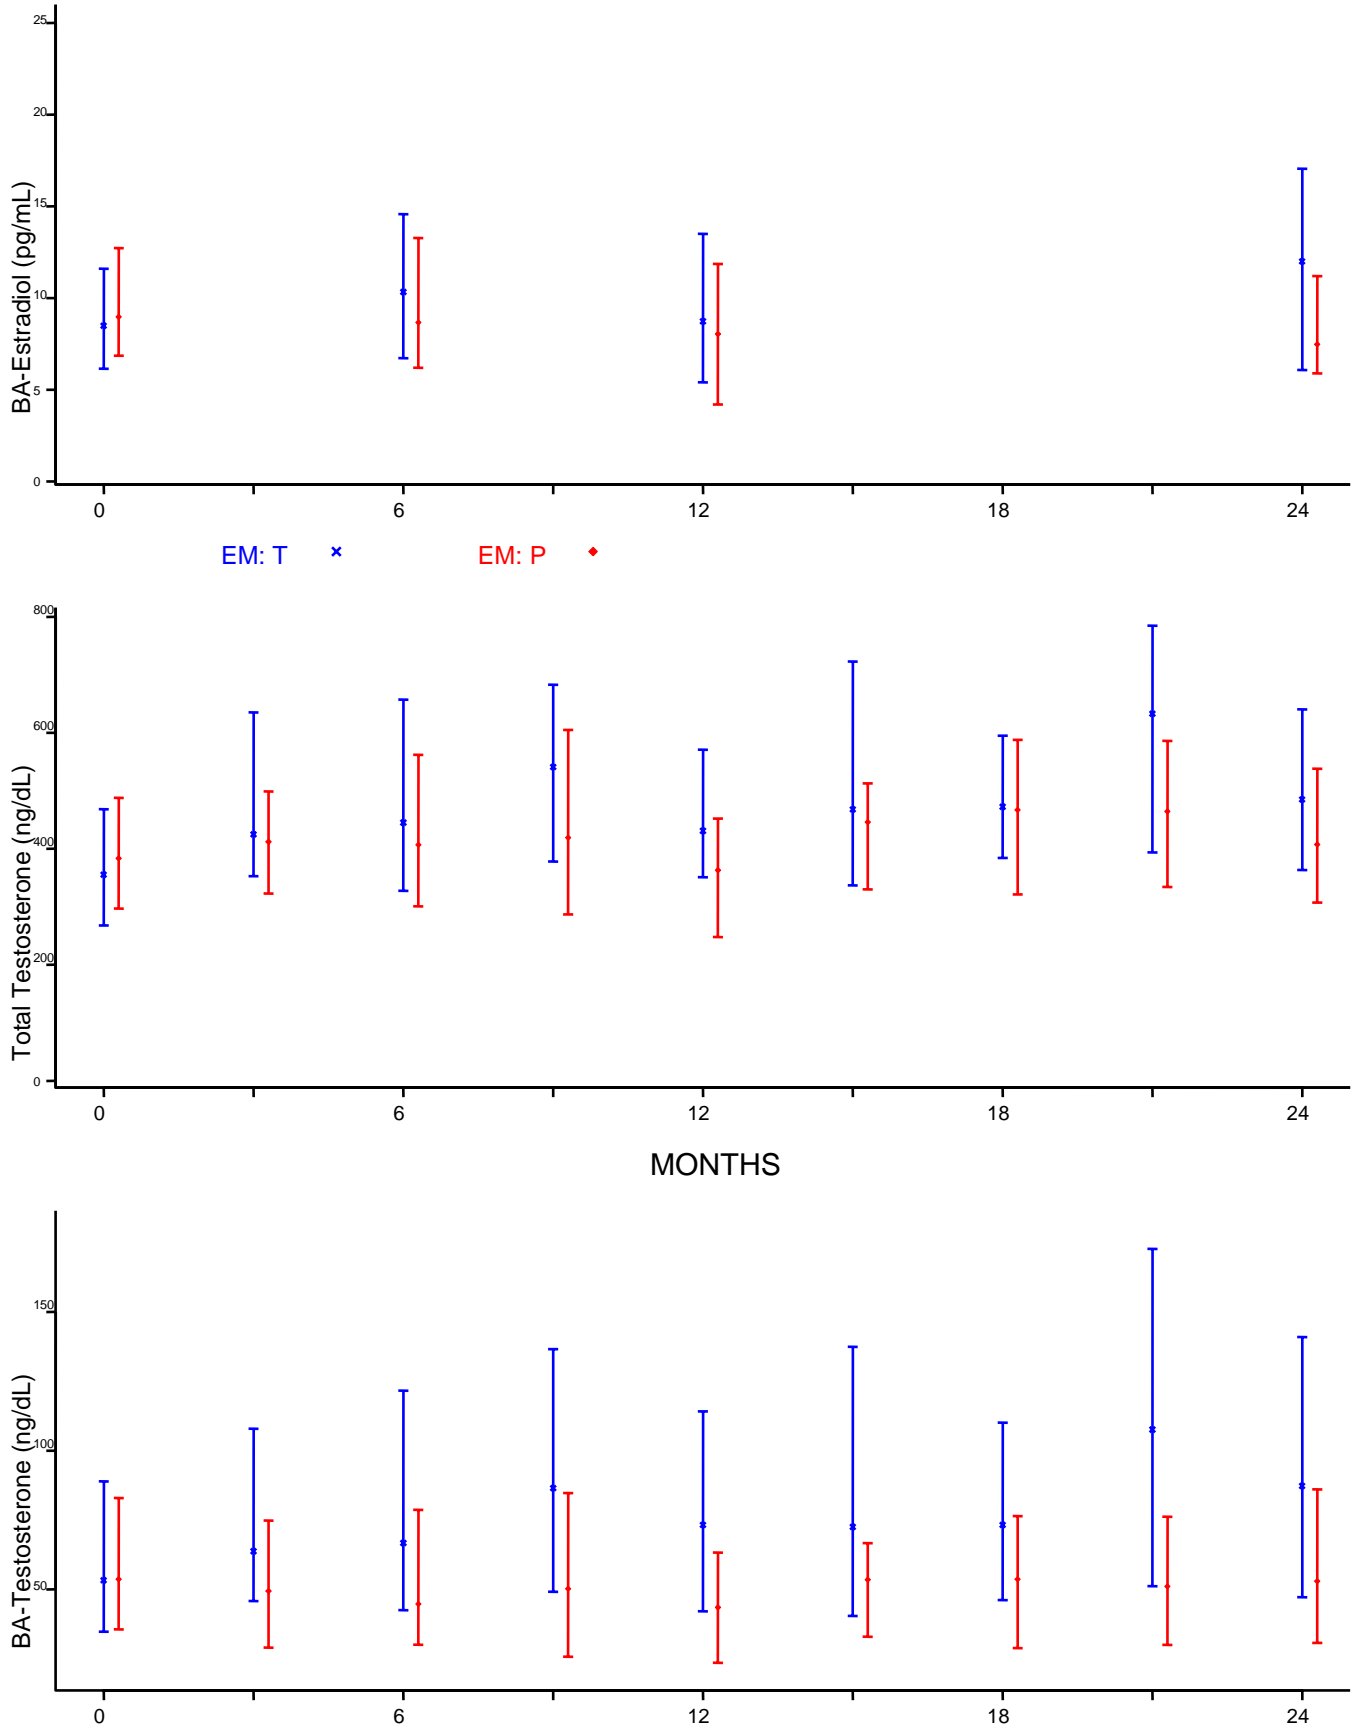

**Supplemental Figure 2: Hormone levels (total and bioavailable), testosterone and bioavailable estradiol levels in elderly men on placebo (EM:P) and elderly men on testosterone (EM:T) representing random sample measurements. Table 3 provides changes in total testosterone (average of 3) and BioT (average of 10) averages of multiple samples over 24 hours**

MEDIAN (IQR)

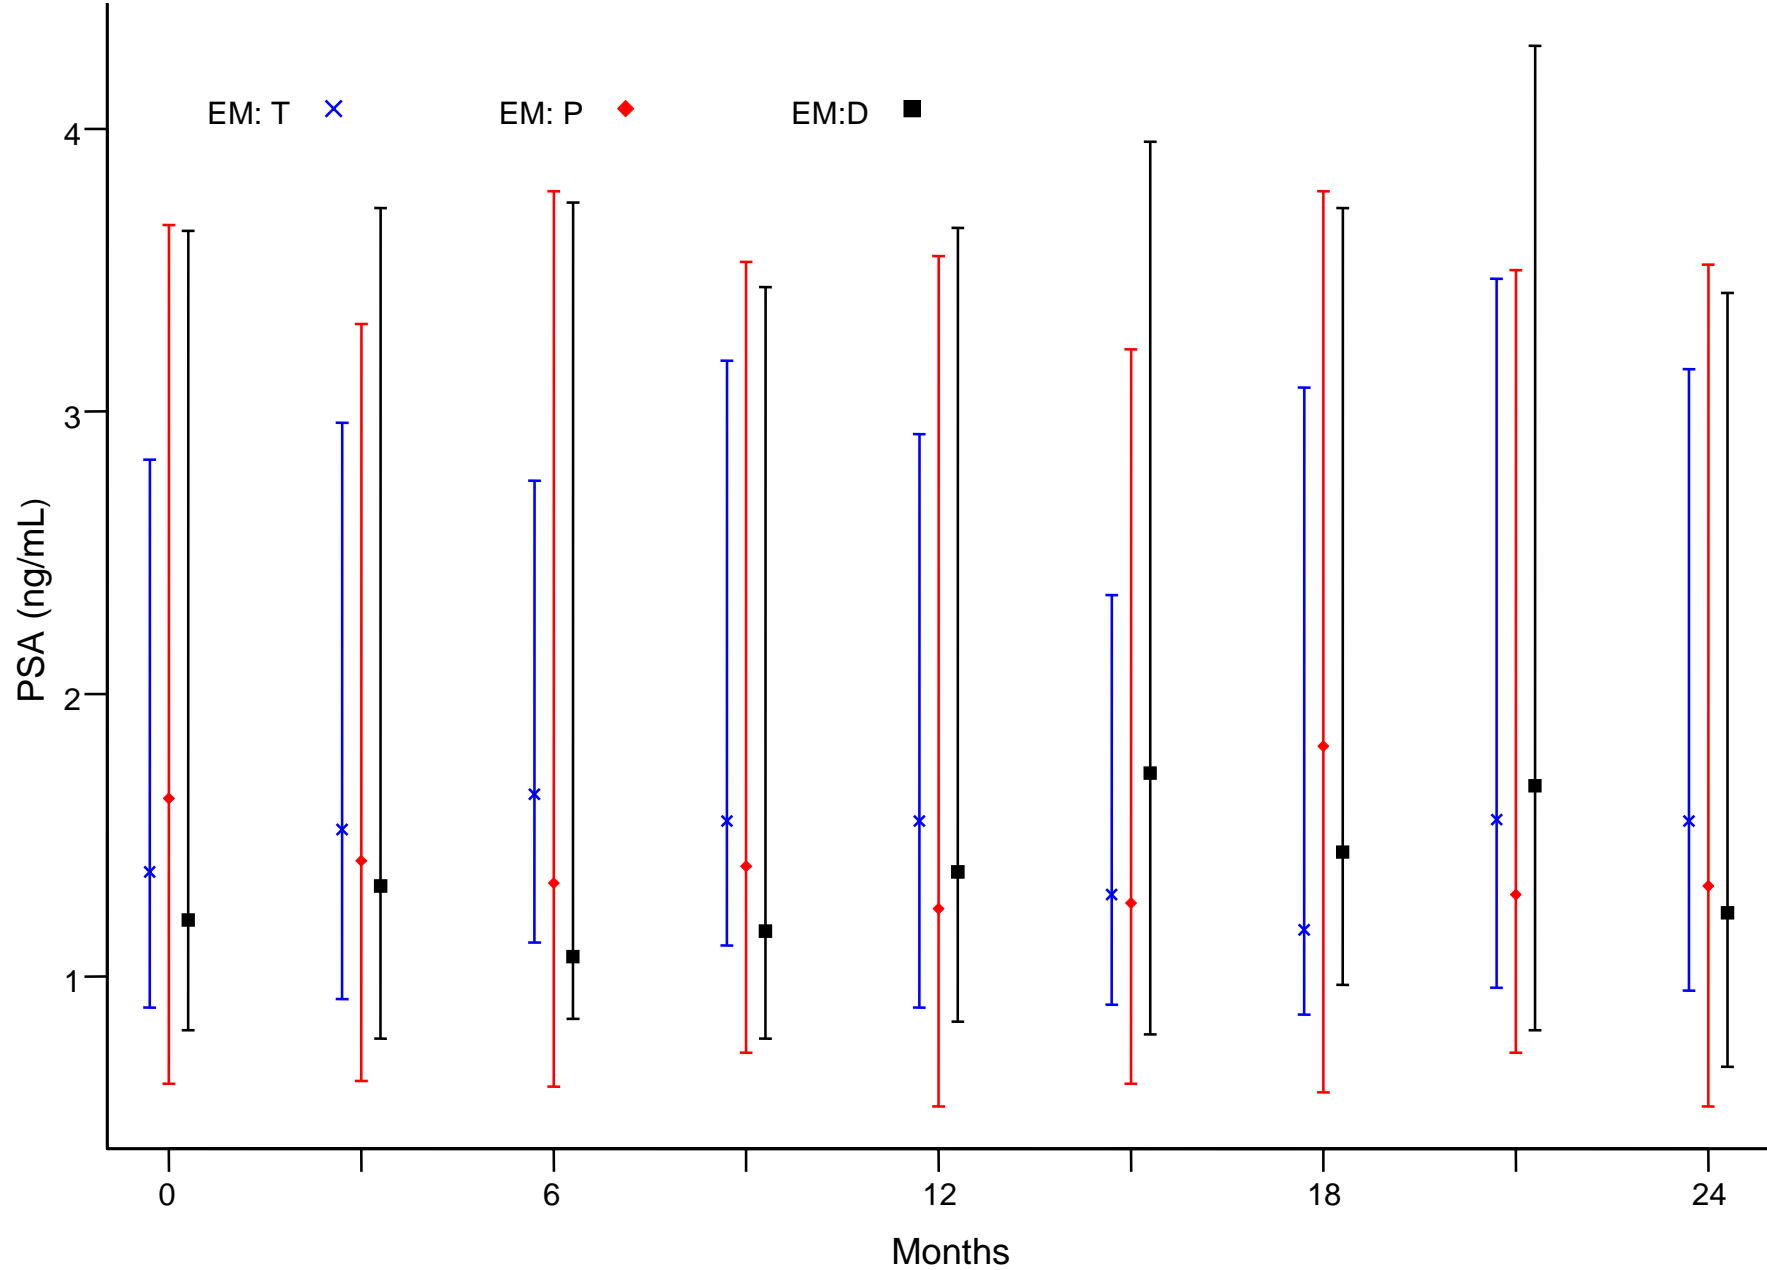

Supplemental Figure 3: Plasma concentrations of PSA in elderly men on DHEA, testosterone and placebo (EM:D, EM:T, and EM:P) showing no changes during the study period

## Supplement Table 1: Exclusion criteria

### 1) Diseases

- Ischemic heart disease
- Renal disease
- Uncontrolled hypertension
- Diabetes mellitus
- Malignancy
- Malabsorption
- Bone disorders
- Chronic obstructive pulmonary disease
- Sleep apnea

### 2) Medications

- Adrenal steroids
- Anticonvulsant therapy
- Thiazide diuretics
- Estrogen replacement therapy

### 3) Exercise status

Volunteers who were taking medications that may affect any of the outcome measures.  
People engaged in a regular exercise program lasting longer than 20 minutes involving more than 2 sessions/week were also excluded.

### 4) Abnormal laboratory measurements

- Serum calcium
- Phosphorus
- Alkaline phosphatase
- Aspartate aminotransferase
- Creatinine
- Urinary calcium
- Thyroid stimulating hormone
- Erythrocyte sedimentation rate

| <b>Supplemental Table 2. Baseline Characteristics of Young Subjects: Data is given as median (lower and upper quartile)</b> |                      |                       |
|-----------------------------------------------------------------------------------------------------------------------------|----------------------|-----------------------|
|                                                                                                                             | <b>Young</b>         |                       |
| <b>Parameter</b>                                                                                                            | <b>Males (n=37)</b>  | <b>Females (n=38)</b> |
| Age (yrs)                                                                                                                   | 23.6 (21.0, 26.0)    | 21.9 (20.4, 23.7)     |
| BMI (kg/m <sup>2</sup> )                                                                                                    | 25.5 (23.7, 27.5)    | 23.2 (21.8, 26.0)     |
| <b>BODY COMPOSITION</b>                                                                                                     |                      |                       |
| Body fat (%)                                                                                                                | 21.8 (16.4, 27.2)    | 31.7 (27.6, 35.4)     |
| Visceral fat/total fat ratio                                                                                                | 0.12 (0.10, 0.14)    | 0.06 (0.05, 0.08)     |
| FFM (kg)                                                                                                                    | 62.3 (59.1, 65.7)    | 41.8 (39.6, 44.6)     |
| <b>BONE PARAMETERS - BMD</b>                                                                                                |                      |                       |
| AP spine (gm/cm <sup>2</sup> )                                                                                              | 1.30 (1.19, 1.37)    | 1.21 (1.16, 1.29)     |
| Femur neck (gm/cm <sup>2</sup> )                                                                                            | 1.21 (1.09, 1.35)    | 1.05 (1.01, 1.16)     |
| Total femur (gm/cm <sup>2</sup> )                                                                                           | 1.22 (1.10, 1.28)    | 1.09 (1.00, 1.15)     |
| Ultradistal radius (gm/cm <sup>2</sup> )                                                                                    | 0.56 (0.51, 0.62)    | 0.43 (0.40, 0.46)     |
| <b>PERFORMANCE</b>                                                                                                          |                      |                       |
| VO <sub>2</sub> max (ml/kgFFM)                                                                                              | 58.2 (52.5, 65.9)    | 54.5 (51.1, 58.6)     |
| Seated chest press (kg)                                                                                                     | 81.6 (70.3, 90.7)    | 38.6 (35.2, 45.4)     |
| Isometric knee extension (kg)                                                                                               | 61.1 (53.5, 68.8)    | 37.3 (31.3, 47.4)     |
| <b>HORMONES AND GLUCOSE</b>                                                                                                 |                      |                       |
| DHEAS levels (ug/mL)                                                                                                        | 2.53 (1.93, 3.13)    | 1.45 (1.13, 2.07)     |
| Total testosterone (ng/dL)                                                                                                  | 471.8 (394.1, 534.3) | 30.0 (27.6, 33.8)     |
| Bioavailable testosterone (ng/dL)                                                                                           | 126.1 (110.8, 175.9) | NA                    |
| Fasting glucose(mg/dL)                                                                                                      | 88.8 (87.1, 90.2)    | 85.7 (82.7, 88.2)     |
| Fasting insulin (uU/mL)                                                                                                     | 3.56 (2.83, 4.45)    | 4.74 (3.44, 6.11)     |
| Insulin sensitivity (10 <sup>-4</sup> dl/kg/min per uU/ml )                                                                 | 20.00 (13.10, 27.00) | 10.70 (8.46, 18.70)   |
| C-peptide (nmol/L)                                                                                                          | 0.87 (0.74, 1.05)    | 1.06 (0.87, 1.23)     |
| Estradiol (pg/mL)                                                                                                           | 27.0 (20.0, 31.0)    | 15.0 (5.0, 56.8)      |
| Bioavailable estradiol (pg/mL)                                                                                              | 14.91 (11.25, 19.61) | 5.52 (0.91, 20.83)    |
| HDL cholesterol (mg/dL)                                                                                                     | 36.5 (30.5, 46.0)    | 47.0 (40.0, 61.0)     |
| LDL cholesterol (mg/dL)                                                                                                     | 83.0 (67.8, 99.2)    | 75.8 (63.8, 93.8)     |
| Triglycerides (mg/dL)                                                                                                       | 100.0 (84.0, 114.0)  | 92.0 (70.0, 119.0)    |

| Supplemental Table 3. Changes in Study Subjects ( 24 Month – Baseline ): Data is given as median (lower and upper quartile) in placebo (P), DHEA (D), and testosterone (T) group |                      |                        |                 |                       |                      |                 |                     |                 |                                 |
|----------------------------------------------------------------------------------------------------------------------------------------------------------------------------------|----------------------|------------------------|-----------------|-----------------------|----------------------|-----------------|---------------------|-----------------|---------------------------------|
| Outcome Variables                                                                                                                                                                | Elderly Males (EM)   |                        | EM: D vs. EM: P | Elderly Females (EF)  |                      | EF: D vs. EF: P | EM: T vs. EM: P     | EM: T vs. EM: P | EM: D & EF: D vs. EM: P & EF: P |
|                                                                                                                                                                                  | Placebo (P)          | DHEA (D)               | p-values*       | Placebo (P)           | DHEA (D)             | p-values*       | Testosterone (T)    | p-values*       | p-values*                       |
| <b>BODY COMPOSITION VARIABLES</b>                                                                                                                                                |                      |                        |                 |                       |                      |                 |                     |                 |                                 |
| Body fat (%)                                                                                                                                                                     | -0.60 (-1.86, 1.39)  | -0.74 (-2.08, 1.77)    | 0.43            | 0.21 (-2.05, 1.07)    | -2.02 (-2.75, 1.90)  | 0.090           | -1.83 (-2.94, 0.85) | 0.077           | 0.048                           |
| FFM (kg) <sup>§</sup>                                                                                                                                                            | -0.63 (-1.70, 0.45)  | 0.16 (-0.79, 1.59)     | 0.055           | -0.06 (-0.63, 0.93)   | 0.70 (-0.18, 1.49)   | 0.19            | 0.58 (-0.24, 1.84)  | <0.001          | 0.008                           |
| Visceral fat (CT & DEXA) <sup>†</sup>                                                                                                                                            | 175 (-563, 597)      | 114 (-491, 655)        | 0.88            | 113 (-394, 482)       | -70 (-286, 168)      | 0.43            | 1 (-260, 178)       | 0.48            | 0.56                            |
| Thigh muscle (gm <sup>2</sup> )                                                                                                                                                  | 1.19 (-21.35, 19.74) | -10.40 (-39.25, 13.70) | 0.42            | -3.48 (-17.35, 5.21)  | 9.22 (-4.90, 13.76)  | 0.098           | 0.34 (-17.00, 9.73) | 0.89            | 0.96                            |
| <b>BONE MINERAL DENSITY VARIABLES</b>                                                                                                                                            |                      |                        |                 |                       |                      |                 |                     |                 |                                 |
| AP spine (gm/cm <sup>2</sup> )                                                                                                                                                   | 0.01 (-0.01, 0.07)   | 0.01 (-0.01, 0.05)     | 0.96            | -0.003 (-0.03, 0.02)  | 0.01 (-0.03, 0.04)   | 0.63            | 0.03 (0.003, 0.05)  | 0.38            | 0.52                            |
| Femur neck (gm/cm <sup>2</sup> )                                                                                                                                                 | -0.03 (-0.05, -0.01) | -0.01 (-0.03, 0.02)    | 0.045           | -0.02 (-0.04, -0.001) | -0.01 (-0.04, 0.00)  | 0.69            | 0.01 (-0.02, 0.03)  | 0.002           | 0.063                           |
| Total femur (gm/cm <sup>2</sup> )                                                                                                                                                | -0.001 (-0.01, 0.02) | 0.01 (-0.01, 0.02)     | 0.30            | -0.001 (-0.03, 0.02)  | -0.002 (-0.01, 0.02) | 0.38            | 0.01 (-0.01, 0.02)  | 0.26            | 0.18                            |
| Ultradistal radius (gm/cm <sup>2</sup> )                                                                                                                                         | -0.004 (-0.01, 0.01) | 0.003(-0.01, 0.02)     | 0.58            | -0.01 (-0.02, 0.01)   | 0.01 (-0.01, 0.02)   | 0.005           | 0.01 (0.00, 0.02)   | 0.064           | 0.016                           |
| <b>PHYSICAL PERFORMANCE VARIABLES</b>                                                                                                                                            |                      |                        |                 |                       |                      |                 |                     |                 |                                 |
| VO <sub>2</sub> max (ml/kg FFM)                                                                                                                                                  | -1.66 (-3.84, 4.49)  | -1.74 (-4.76, 0.71)    | 0.45            | -1.84 (-3.01, 0.71)   | -3.01 (-4.80, 1.66)  | 0.26            | 0.16 (-3.05, 2.78)  | 0.83            | 0.20                            |
| Leg press (kg)                                                                                                                                                                   | 2.27 (-4.54, 13.61)  | 4.54 (0.00, 9.07)      | 0.46            | 0.00 (-1.13, 4.54)    | 2.27 (0.00, 4.54)    | 0.92            | 4.54 (0.00, 13.61)  | 0.15            | 0.45                            |
| Isometric knee extension (kg)                                                                                                                                                    | -0.29 (-5.58, 3.63)  | 0.45 (-5.62, 3.40)     | 0.57            | -2.29 (-4.31, 0.32)   | -1.36 (-3.27, 2.72)  | 0.54            | -0.59 (-6.03, 3.81) | 0.82            | 0.68                            |
| Seated chest press (kg)                                                                                                                                                          | 2.27 (0.00, 6.80)    | 4.54 (2.27, 6.80)      | 0.34            | 2.27 (0.00, 4.54)     | 2.27 (0.00, 6.80)    | 0.94            | 5.67 (0.00, 6.80)   | 0.38            | 0.53                            |
| <b>QUALITY OF LIFE</b>                                                                                                                                                           |                      |                        |                 |                       |                      |                 |                     |                 |                                 |
| Mental component score                                                                                                                                                           | 0.42 (-4.22, 3.80)   | -0.06 (-1.92, 0.65)    | 0.59            | -0.47 (-5.50, 3.95)   | 0.36 (-2.96, 3.16)   | 0.61            | -0.14 (-1.39, 2.20) | 0.38            | 0.48                            |
| Physical component score                                                                                                                                                         | -0.05 (-2.69, 3.40)  | -0.70 (-2.96, 1.22)    | 0.12            | -1.02 (-3.77, 2.25)   | 0.20 (-3.72, 3.54)   | 0.91            | -0.01 (-1.68, 1.94) | 0.36            | 0.34                            |

| <b>HORMONAL AND METABOLIC VARIABLES</b>                                |                       |                       |        |                        |                        |        |                        |        |        |
|------------------------------------------------------------------------|-----------------------|-----------------------|--------|------------------------|------------------------|--------|------------------------|--------|--------|
| <b>Total Testosterone (ng/dL)</b>                                      | 16.29 (-14.56, 60.80) | 3.78 (-23.04, 28.25)  | 0.13   | -7.71 (-12.70, -2.50)  | 10.40 (1.60, 25.50)    | <0.001 | 106.43 (39.00, 246.87) | 0.002  | 0.10   |
| <b>SHBG (nmol/L)</b>                                                   | 1.10 (-5.25, 5.35)    | -2.97 (-5.00, 2.41)   | 0.053  | -0.25 (-8.30, 5.05)    | -11.51 (-27.15, -3.52) | <0.001 | 1.00 (-3.02, 5.41)     | 0.99   | <0.001 |
| <b>Estradiol (pg/mL)</b>                                               | -0.60 (-5.00, 3.20)   | 19.80 (11.90, 24.00)  | <0.001 | 0.00 (-1.10, 1.80)     | 20.90 (14.90, 26.40)   | <0.001 | 1.15 (-4.30, 7.00)     | 0.67   | <0.001 |
| <b>FSH (IU/L)</b>                                                      | 0.50 (-0.70, 1.70)    | 0.30 (-0.20, 1.10)    | 0.74   | -2.55 (-7.30, 0.90)    | -3.40 (-12.30, 0.40)   | 0.17   | -3.00 (-4.20, -1.20)   | <0.001 | 0.40   |
| <b>Luteinizing Hormone (IU/L)</b>                                      | 0.40 (-0.60, 1.90)    | 0.00 (-0.70, 1.30)    | 0.51   | -1.15 (-2.90, 2.80)    | -0.50 (-5.10, 2.90)    | 0.80   | -1.80 (-3.10, -1.10)   | <0.001 | 0.65   |
| <b>Insulin (uU/mL)</b>                                                 | 0.39 (-0.11, 1.66)    | 0.18 (-0.28, 1.08)    | 0.53   | 0.35 (-0.27, 0.75)     | 0.16 (-0.53, 0.40)     | 0.41   | -0.20 (-0.56, 0.21)    | 0.003  | 0.30   |
| <b>Insulin Sensitivity Index (10<sup>-4</sup> dl/kg/min per uU/ml)</b> | 0.70 (-2.47, 3.94)    | 1.02 (-3.55, 4.22)    | 0.73   | -0.64 (-2.32, 3.35)    | -1.50 (-5.50, 1.73)    | 0.21   | 3.33 (-1.26, 4.97)     | 0.22   | 0.52   |
| <b>PSA (ng/mL)</b>                                                     | -0.07 (-0.26, 0.60)   | -0.08 (-0.22, 0.20)   | 0.95   | NA                     | NA                     | NA     | 0.04 (-0.16, 0.34)     | 0.46   | NA     |
| <b>Glucose (mg/dL)</b>                                                 | -0.49 (-3.44, 1.75)   | -0.49 (-3.35, 0.67)   | 0.58   | -2.05 (-3.28, 1.19)    | -1.62 (-4.72, 1.84)    | 0.66   | 1.04 (-3.22, 3.13)     | 0.77   | 0.43   |
| <b>HDL Cholesterol (mg/dL)</b>                                         | -1.50 (-6.00, 2.00)   | -6.00 (-10.00, 0.00)  | 0.056  | -4.50 (-8.00, 1.00)    | -8.00 (-18.00, -4.00)  | 0.003  | -1.00 (-4.00, 3.00)    | 0.80   | <0.001 |
| <b>LDL Cholesterol (mg/dL)</b>                                         | -8.40 (-27.20, 9.00)  | -13.20 (-26.80, 1.40) | 0.41   | -11.15 (-25.60, 11.00) | -4.20 (-21.20, 10.90)  | 0.37   | -13.20 (-29.20, -0.20) | 0.26   | 0.87   |
| <b>Triglycerides (mg/dL)</b>                                           | -3.00 (-23.00, 25.00) | -1.00 (-22.00, 11.00) | 0.69   | -6.50 (-28.00, 10.00)  | -4.00 (-17.00, 12.00)  | 0.92   | 2.50 (-31.00, 16.00)   | 0.91   | 0.75   |

\*Differences are DHEA minus Placebo or Testosterone minus placebo

‡P-values given are two-sided and come from a model that was adjusted for gender, age at the time of randomization, the time from randomization, and for the baseline value.

†Visceral Fat (CT & DEXA) p-values are two-sided and come from a model that adjusted for gender, age at the time of randomization, the time from randomization, the baseline value, and the difference of total body fat (DEXA).

§*Fat free mass (FFM) p-values are two-sided and come from a model that adjusted for gender, age at the time of randomization, the time from randomization, the baseline value, FFM when men and women combined (placebo: median:= -0.29, lower upper quartiles: -1.45, 0.53, and DHEA median=0.33 and quartiles: -0.44, 1.54)*

**Supplement Table 4. Reported Adverse Events by Body System for all 151 randomized subjects (excluding one DHEA subject who was found to be ineligible after randomization)**

| System (Unique Patients)          | Total | DHEA | Elderly Males |         | Elderly Females |         |
|-----------------------------------|-------|------|---------------|---------|-----------------|---------|
|                                   |       |      | Testosterone  | Placebo | DHEA            | Placebo |
|                                   | 151   | 30   | 30            | 32      | 29              | 30      |
| <b>Cardiovascular</b>             | 20    | 2    | 5             | 5       | 6               | 2       |
| Angina                            | 1     | 0    | 0             | 0       | 1               | 0       |
| Aortic aneurism                   | 1     | 1    | 0             | 0       | 0               | 0       |
| Ascending aorta dilatation        | 4     | 1    | 1             | 2       | 0               | 0       |
| Asym.,Hypertrophic Cardiomyopathy | 1     | 0    | 0             | 0       | 1               | 0       |
| Atrial fibrillation               | 1     | 0    | 0             | 0       | 1               | 0       |
| Bradycardia                       | 1     | 1    | 0             | 0       | 0               | 0       |
| CAD Stent Placement               | 3     | 0    | 0             | 1       | 1               | 1       |
| Chest pain                        | 2     | 0    | 0             | 1       | 1               | 0       |
| Coronary Artery Bypass Graft      | 1     | 0    | 1             | 0       | 0               | 0       |
| Coronary Artery Disease (CAD)     | 3     | 0    | 2             | 0       | 1               | 0       |
| Deep Vein Thrombosis              | 1     | 0    | 0             | 0       | 1               | 0       |
| Dilated Cardiomyopathy            | 1     | 0    | 0             | 0       | 1               | 0       |
| Frequent Ventricular Ectopics     | 1     | 0    | 1             | 0       | 0               | 0       |
| Hypertension                      | 2     | 0    | 0             | 0       | 1               | 1       |
| Hypotension                       | 1     | 0    | 0             | 1       | 0               | 0       |
| Myocardial Infarction             | 1     | 0    | 0             | 0       | 1               | 0       |
| Palpitations                      | 1     | 0    | 0             | 0       | 0               | 1       |
| Phlebitis                         | 3     | 0    | 1             | 1       | 1               | 0       |
| Triple Bypass Surgery             | 1     | 0    | 1             | 0       | 0               | 0       |
| <b>Gastrointestinal</b>           | 5     | 0    | 2             | 1       | 2               | 0       |
| Colon Adenocarcinoma              | 1     | 0    | 1             | 0       | 0               | 0       |
| Diarrhea                          | 2     | 0    | 0             | 1       | 1               | 0       |
| GI bleeding                       | 1     | 0    | 0             | 0       | 1               | 0       |
| Hemicolectomy                     | 1     | 0    | 1             | 0       | 0               | 0       |
| Vomiting                          | 1     | 0    | 1             | 0       | 0               | 0       |

| System (Unique Patients)                  | Total     | DHEA     | Elderly Males |          | Elderly Females |          |
|-------------------------------------------|-----------|----------|---------------|----------|-----------------|----------|
|                                           |           |          | Testosterone  | Placebo  | DHEA            | Placebo  |
| <b>Genitourinary</b>                      | <b>22</b> | <b>4</b> | <b>8</b>      | <b>6</b> | <b>1</b>        | <b>3</b> |
| Cholecystectomy                           | 1         | 0        | 0             | 1        | 0               | 0        |
| Epididymal Cyst                           | 1         | 0        | 1             | 0        | 0               | 0        |
| Peripelvic Cyst/Mild Pyelocystitis        | 1         | 0        | 0             | 0        | 0               | 1        |
| Testicular Pain                           | 1         | 0        | 1             | 0        | 0               | 0        |
| Vaginal Vault Repair                      | 1         | 0        | 0             | 0        | 1               | 0        |
| <b>Prostate</b>                           | <b>12</b> | <b>3</b> | <b>5</b>      | <b>4</b> | <b>0</b>        | <b>0</b> |
| BPH                                       | 1         | 0        | 0             | 1        | 0               | 0        |
| Elevated PSA                              | 2         | 0        | 0             | 2        | 0               | 0        |
| PIN (Prostatic Intraepithelial Neoplasia) | 3         | 1        | 1             | 1        | 0               | 0        |
| Prostate Biopsy                           | 6         | 1        | 4             | 1        | 0               | 0        |
| Prostate Cancer                           | 1         | 0        | 0             | 1        | 0               | 0        |
| Prostate Nodule                           | 1         | 0        | 1             | 0        | 0               | 0        |
| Prostatism                                | 1         | 1        | 0             | 0        | 0               | 0        |
| Prostatitis                               | 2         | 1        | 1             | 0        | 0               | 0        |
| <b>Bladder</b>                            | <b>6</b>  | <b>1</b> | <b>2</b>      | <b>1</b> | <b>0</b>        | <b>2</b> |
| Cystoscopy                                | 2         | 0        | 1             | 1        | 0               | 0        |
| Increased urinary frequency+/- urgency    | 1         | 0        | 1             | 0        | 0               | 0        |
| Nocturia                                  | 1         | 0        | 1             | 0        | 0               | 0        |
| Pain with urination                       | 1         | 0        | 1             | 0        | 0               | 0        |
| Post TUNA urinary symptomology            | 1         | 1        | 0             | 0        | 0               | 0        |
| Renal Collecting System Dilatation        | 1         | 0        | 0             | 1        | 0               | 0        |
| Right Renal Mass                          | 1         | 0        | 0             | 0        | 0               | 1        |
| Urethral Stricture                        | 1         | 0        | 1             | 0        | 0               | 0        |
| Urinary frequency                         | 1         | 0        | 1             | 0        | 0               | 0        |
| Urinary Obstruction                       | 2         | 0        | 2             | 0        | 0               | 0        |
| Urinary retention                         | 1         | 0        | 1             | 0        | 0               | 0        |
| Urinary tract infection                   | 1         | 0        | 0             | 0        | 0               | 1        |
| <b>Hematopoietic &amp; Lymphatic</b>      | <b>8</b>  | <b>0</b> | <b>2</b>      | <b>2</b> | <b>3</b>        | <b>1</b> |
| Anemia                                    | 1         | 0        | 0             | 0        | 1               | 0        |
| Bcell chronic lymphocytic leukemia        | 1         | 0        | 0             | 1        | 0               | 0        |
| Biopsy Site Hematoma                      | 1         | 0        | 0             | 0        | 1               | 0        |
| Bruising                                  | 1         | 0        | 0             | 0        | 0               | 1        |
| Elevated Liver Function Test              | 1         | 0        | 0             | 0        | 1               | 0        |
| Erythematous Rash                         | 1         | 0        | 0             | 1        | 0               | 0        |
| Microscopic Hematoma                      | 1         | 0        | 1             | 0        | 0               | 0        |
| Pancytopenia                              | 1         | 0        | 1             | 0        | 0               | 0        |

| System (Unique Patients)              | Total     | DHEA      | Elderly Males |           | Elderly Females |           |
|---------------------------------------|-----------|-----------|---------------|-----------|-----------------|-----------|
|                                       |           |           | Testosterone  | Placebo   | DHEA            | Placebo   |
| <b>Immunologic</b>                    | <b>12</b> | <b>0</b>  | <b>6</b>      | <b>2</b>  | <b>3</b>        | <b>1</b>  |
| Allergic Rx. to Abx.                  | 1         | 0         | 0             | 0         | 1               | 0         |
| Cellulitis                            | 3         | 0         | 1             | 0         | 1               | 1         |
| Dermatitis                            | 2         | 0         | 2             | 0         | 0               | 0         |
| Erythema at Patch Site                | 1         | 0         | 0             | 1         | 0               | 0         |
| Infected Right Neck Phlegmon          | 1         | 0         | 0             | 0         | 1               | 0         |
| Rash                                  | 2         | 0         | 1             | 0         | 1               | 0         |
| Redness at Abdominal fat biopsy site  | 1         | 0         | 1             | 0         | 0               | 0         |
| Soreness at Abdominal fat biopsy site | 1         | 0         | 1             | 0         | 0               | 0         |
| Squamous cell carcinoma on ear        | 1         | 0         | 0             | 1         | 0               | 0         |
| Urticaria                             | 1         | 0         | 1             | 0         | 0               | 0         |
| <b>Musculoskeletal</b>                | <b>5</b>  | <b>3</b>  | <b>1</b>      | <b>0</b>  | <b>0</b>        | <b>1</b>  |
| Fractured ribs                        | 1         | 1         | 0             | 0         | 0               | 0         |
| Fractured Wrist                       | 1         | 1         | 0             | 0         | 0               | 0         |
| Knee Arthroscopy                      | 2         | 1         | 1             | 0         | 0               | 0         |
| Total Knee Arthroplasty               | 3         | 1         | 1             | 0         | 0               | 1         |
| <b>Nervous</b>                        | <b>7</b>  | <b>1</b>  | <b>1</b>      | <b>2</b>  | <b>2</b>        | <b>1</b>  |
| Anxiety                               | 1         | 0         | 0             | 0         | 1               | 0         |
| <b>Death</b>                          | <b>1</b>  | <b>0</b>  | <b>0</b>      | <b>0</b>  | <b>1</b>        | <b>0</b>  |
| Dizziness                             | 1         | 0         | 1             | 0         | 0               | 0         |
| General Malaise                       | 1         | 0         | 0             | 0         | 0               | 1         |
| Intracranial hemorrhage               | 1         | 0         | 0             | 0         | 1               | 0         |
| Loss of consciousness                 | 1         | 0         | 0             | 1         | 0               | 0         |
| Pinched Back Nerve                    | 1         | 1         | 0             | 0         | 0               | 0         |
| Restless legs                         | 1         | 0         | 0             | 0         | 0               | 1         |
| Sensorineural hearing loss            | 1         | 0         | 0             | 1         | 0               | 0         |
| <b>Respiratory</b>                    | <b>11</b> | <b>3</b>  | <b>2</b>      | <b>3</b>  | <b>2</b>        | <b>1</b>  |
| Indeterminant Lung Nodule             | 1         | 1         | 0             | 0         | 0               | 0         |
| Laryngospasm                          | 1         | 1         | 0             | 0         | 0               | 0         |
| Obstructive Sleep Apnea               | 1         | 0         | 0             | 1         | 0               | 0         |
| Pneumonia                             | 1         | 0         | 0             | 0         | 1               | 0         |
| Probable Sleep Apnea                  | 5         | 1         | 0             | 2         | 1               | 1         |
| Pulmonary Nodules                     | 1         | 0         | 1             | 0         | 0               | 0         |
| Septoplasty                           | 1         | 0         | 1             | 0         | 0               | 0         |
| <b>No Adverse Events</b>              | <b>83</b> | <b>17</b> | <b>12</b>     | <b>17</b> | <b>16</b>       | <b>21</b> |

| System (Unique Patients)            | Total | DHEA | Elderly Males |         | Elderly Females |         |
|-------------------------------------|-------|------|---------------|---------|-----------------|---------|
|                                     |       |      | Testosterone  | Placebo | DHEA            | Placebo |
| Other                               | 9     | 2    | 1             | 4       | 2               | 0       |
| Breast Cancer                       | 1     | 0    | 0             | 1       | 0               | 0       |
| Cataract Surgery                    | 1     | 1    | 0             | 0       | 0               | 0       |
| Chills                              | 1     | 0    | 0             | 1       | 0               | 0       |
| Exhaustion                          | 1     | 0    | 0             | 0       | 1               | 0       |
| Febrile                             | 1     | 0    | 0             | 1       | 0               | 0       |
| Gynecomastia                        | 3     | 1    | 0             | 2       | 0               | 0       |
| Hemorrhoids                         | 1     | 0    | 0             | 1       | 0               | 0       |
| Hernia                              | 1     | 0    | 0             | 0       | 1               | 0       |
| Mastectomy                          | 1     | 0    | 0             | 1       | 0               | 0       |
| Right Upper Quadrant abdominal pain | 1     | 0    | 1             | 0       | 0               | 0       |

---

NOTE: Among elderly women, there were nonsignificantly more cardiovascular events in the DHEA group than the placebo group (6/29 vs. 2/30, exact p-value=0.14). For men and women combined, the exact p-value=0.79.

Among elderly men, there were nonsignificantly more rashes, etc in the testosterone group than the placebo group (6/30 vs. 2/32, exact p-value=0.14).

Among elderly men, there were nonsignificantly more musculoskeletal events in the DHEA group than the placebo group (3/30 vs. 0/32, exact p-value 0.11). For men and women combined, the exact p-value=0.36.

No other body systems or individual adverse events showed any differences between groups (exact p-value>0.20 for all). Neither DHEA or testosterone groups had more adverse events than the placebo groups either within gender or with both genders combined (DHEA vs. placebo)(all exact p-values>0.25). The one death on study occurred in an elderly female on DHEA.

**Supplement Table 5. Prostate Volume (cm<sup>3</sup>) for Elderly Male (EM) Subjects – No statistical differences between groups**

|                  |          | Median (IQR)         | Minimum, Maximum |
|------------------|----------|----------------------|------------------|
| EM: DHEA         | Baseline | 31.65 (25.13, 43.07) | 14.66, 124.98    |
|                  | 24 Month | 33.32 (24.32, 44.13) | 13.07, 108.86    |
| EM: Testosterone | Baseline | 28.39 (20.29, 40.00) | 11.13, 60.70     |
|                  | 24 Month | 33.62 (24.88, 47.21) | 19.73, 100.83    |
| EM: Placebo      | Baseline | 29.55 (19.06, 36.71) | 8.79, 115.59     |
|                  | 24 Month | 33.16 (19.45, 47.25) | 0.00, 145.46     |

| <b>Supplement Table 6. Changes in Secondary Outcome Variables (24-month - baseline) – Median and 95% Confidence Intervals (CI) of all possible differences between groups*</b> |                                    |                            |                                             |                            |                                    |                            |
|--------------------------------------------------------------------------------------------------------------------------------------------------------------------------------|------------------------------------|----------------------------|---------------------------------------------|----------------------------|------------------------------------|----------------------------|
|                                                                                                                                                                                | <b>EM:DHEA vs.<br/>EM: Placebo</b> | <b>P-value<sup>‡</sup></b> | <b>EM: Testosterone vs.<br/>EM: Placebo</b> | <b>P-value<sup>‡</sup></b> | <b>EF:DHEA vs.<br/>EF: Placebo</b> | <b>P-value<sup>‡</sup></b> |
| <b>SECONDARY OUTCOME VARIABLES</b>                                                                                                                                             |                                    |                            |                                             |                            |                                    |                            |
| <b>Distal 10% Radius (gm/cm<sup>2</sup>)</b>                                                                                                                                   | 0.01 (-0.01, 0.02)                 | 0.43                       | 0.01 (-0.003, 0.02)                         | 0.18                       | 0.01 (-0.01, 0.03)                 | 0.15                       |
| <b>C-peptide (nmol/L)</b>                                                                                                                                                      | -0.02 (-0.11, 0.08)                | 0.67                       | -0.06 (-0.14, 0.03)                         | 0.16                       | 0.11 (0.02, 0.23)                  | 0.007                      |
| <b>SHBG (nmol/L)</b>                                                                                                                                                           | -1.98 (-5.35, 1.17)                | 0.053                      | 0.75 (-2.48, 3.91)                          | 0.99                       | -12.18 (-20.05, -5.90)             | <0.001                     |
| <b>Human Growth Hormone (ng/mL)</b>                                                                                                                                            | -0.13 (-0.29, -0.01)               | 0.036                      | -0.10 (-0.23, 0.04)                         | 0.18                       | -0.01 (-0.16, 0.12)                | 0.80                       |
| <b>ALT (U/L)</b>                                                                                                                                                               | -1 (-3, 2)                         | 0.13                       | 1 (-2, 3)                                   | 0.46                       | 0 (-3, 4)                          | 0.83                       |
| <b>AST (U/L)</b>                                                                                                                                                               | -2 (-5, 2)                         | 0.28                       | -1 (-5, 2)                                  | 0.80                       | 0 (-2, 3)                          | 0.71                       |
| <b>Alkaline Phosphatase (U/L)</b>                                                                                                                                              | -11.0 (-38.0, 12.0)                | 0.38                       | -10.0 (-34.0, 7.0)                          | 0.35                       | -14.5 (-38.0, 15.0)                | 0.23                       |
| <b>Hemoglobin (g/dL)</b>                                                                                                                                                       | 0 (-0.4, 0.4)                      | 0.48                       | 0.3 (-0.2, 0.7)                             | 0.02                       | 0.5 (0.2, 0.9)                     | 0.01                       |

\*Differences are DHEA minus Placebo or Testosterone minus placebo

<sup>‡</sup>P-values given are two-sided and come from a model that was adjusted for gender, age at the time of randomization, the time from randomization, and for the baseline value.

<sup>†</sup>Visceral Fat (CT & DEXA) p-values are two-sided and come from a model that adjusted for gender, age at the time of randomization, the time from randomization, the baseline value, and the difference of total body fat (DEXA).

<sup>§</sup>Fat free mass (FFM) p-values are two-sided and come from a model that adjusted for gender, age at the time of randomization, the time from randomization, the baseline value, and the difference of the resting energy expenditure mean.
